# Supplementary material for: The emergent integrated network structure of scientific research
Source: PLOS journal article supplement (doi:10.1371/journal.pone.0216146), 2019-04-30
Supplement: S6 (10.1371/journal.pone.0216146.s006) [file journal.pone.0216146.s006]

| Correlated Network Measures                               | N = 950 | N = 1000 | N = 1050 |
|-----------------------------------------------------------|---------|----------|----------|
| Small-world propensity - Impact factor ( $\rho$ )         | 0.40    | 0.39     | 0.38     |
| Unbalanced interdisciplinarity - Impact factor ( $\rho$ ) | 0.28    | 0.25     | 0.17     |
| Balanced interdisciplinarity - Impact factor ( $\rho$ )   | 0.45**  | 0.41**   | 0.39**   |

**S5 Table. Effect of network size on the impact factor correlations of the temporal network.** Rows represent the correlations with *PNAS*'s impact factor for various measures of the temporal network. Columns represent their values and statistical significance for different choices of network size. Note: \* =  $p < 0.05$ , \*\* =  $p < 0.01$ .
